**Associations of age at diagnosis of breast cancer with incident myocardial infarction and heart failure: a prospective cohort study**

Jie Liang, BS<sup>1</sup>; Yang Pan, BS<sup>1</sup>; Wenya Zhang, BS<sup>1</sup>; Darui Gao, MJC<sup>2,3,4</sup>; Yongqian Wang, PhD<sup>2,4</sup>; Wuxiang Xie, PhD<sup>2,3,4</sup>; Fanfan Zheng, PhD<sup>1</sup>

**Affiliations**

<sup>1</sup>School of Nursing, Chinese Academy of Medical Sciences & Peking Union Medical College, Beijing, China;

<sup>2</sup>Clinical Research Institute, Institute of Advanced Clinical Medicine, Peking University, Beijing, China;

<sup>3</sup>Peking University First Hospital, Beijing, China;

<sup>4</sup>Key Laboratory of Epidemiology of Major Diseases (Peking University), Ministry of Education, Beijing, China.

**Address for correspondence**

Wuxiang Xie, PhD, FACC, Clinical Research Institute, Institute of Advanced Clinical Medicine, Peking University, No. 38 Xueyuan Road, Haidian District, 100191, Beijing, China.

Orcid: 0000-0001-7527-1022.

Telephone: +86-10-82805836-622; E-mail: [xiewuxiang@hsc.pku.edu.cn](mailto:xiewuxiang@hsc.pku.edu.cn);

Fanfan Zheng, PhD, Department of Clinical Nursing, School of Nursing, Chinese Academy of Medical Sciences & Peking Union Medical College, No. 33 Ba Da Chu Road, Shijingshan District, 100144, Beijing, China.

Orcid: 0000-0003-2767-2600.

Telephone: +86-10-88771099; E-mail: zhengfanfan@nursing.pumc.edu.cn.

### **Running title**

Age at diagnosis of breast cancer and MI and HF

### **Data availability**

The data used for analysis in this study are available from the UK Biobank project site, subject to registration and application processes. Further details can be found at <https://www.ukbiobank.ac.uk>.

### **Funding**

This study was supported by grants from the National Natural Science Foundation of China (82373665 & 81974490), the Nonprofit Central Research Institute Fund of Chinese Academy of Medical Sciences (2021-RC330-001), and the 2022 China Medical Board-open competition research grant (22-466). All authors had no conflict of interest.

### **Conflict of interest**

None.

### **Ethics approval and consent to participate**

The UK Biobank has received ethical consent from the North West Multi-centre Research Ethics Committee (MREC) (299116). Written informed consent was obtained from all participants.

## **Abstract**

### **Background**

The associations of age at diagnosis of breast cancer with incident myocardial infarction (MI) and heart failure (HF) remain unexamined. Addressing this problem could promote understanding of the cardiovascular impact of breast cancer.

### **Methods**

Data were from the UK Biobank. Information on the diagnosis of breast cancer, MI, and HF were collected at baseline and follow-ups (median=12.8 years). The propensity score matching method and Cox proportional hazards models were employed.

### **Results**

A total of 251 277 female participants (mean age: 56.8±8.0 years), of whom 16 241 had breast cancer, were included. Among participants with breast cancer, younger age at diagnosis (per 10-year decrease) was significantly associated with elevated risks of MI (HR=1.36, 95%CI: 1.19 to 1.56,  $P<0.001$ ) and HF (HR=1.31, 95% CI: 1.18 to 1.46,  $P<0.001$ ). After propensity score matching, breast cancer patients with younger diagnosis ages had significantly higher risks of MI and HF than healthy controls.

### **Conclusion**

Younger age at diagnosis of breast cancer was associated with higher risks of incident MI and HF, underscoring the necessity to pay additional attention to the cardiovascular health of breast cancer patients diagnosed at younger ages to conduct timely interventions to attenuate the subsequent risks of incident cardiovascular

diseases.

### **Key Words**

UK Biobank, breast cancer, diagnosis age, myocardial infarction, heart failure, propensity score matching.

### **List of abbreviations**

CVD: Cardiovascular disease

MI: Myocardial infarction

HF: Heart failure

LDL-C: Low-density lipoprotein cholesterol

ICD-10: International Classification of Diseases Tenth Revision

SBP: Systolic blood pressure

DBP: Diastolic blood pressure

## **Introduction**

Globally, breast cancer is the most commonly diagnosed cancer in women, with 2.3 million estimated new cases in 2020 (Sung et al., 2021). Early screening and treatment advancements have resulted in increasing survival (American Cancer Society, 2019; Berry et al., 2005), as more than 80% of breast cancer patients survive for at least 5 years worldwide and nearly 50% of patients survive for 10 years in high-income settings (Allemani et al., 2018; Cancer Research UK, 2019). However, concerns have been raised about long-term comorbidities, particularly cardiovascular disease (CVD), in breast cancer patients along with the prolonged survival period (Armenian et al., 2016; Barish et al., 2019; Blaes and Konety, 2021; Florido et al., 2022). CVD poses a major threat to health and is the predominant cause of death in breast cancer patients (Patnaik et al., 2011), possibly driven by the natural aging process, shared risk factors, and therapy-associated cardiotoxicity (Khouri et al., 2012; Koene et al., 2016; Yeh and Bickford, 2009). For instance, cardiotoxicity induced by anthracycline-based chemotherapy has been repeatedly reported as an adverse effect of breast cancer treatment (Du et al., 2009; Lin and Lengacher, 2019). Previous studies focused on the subsequent CVD risk after the diagnosis of breast cancer revealed that patients had an excess risk of myocardial infarction (MI) and heart failure (HF) (Khan et al., 2011; Reding et al., 2022; Yang et al., 2022).

Improvements in breast cancer screening also increased the number of patients diagnosed at younger ages. The association of breast cancer with HF was found to be affected by age, as an increased risk of HF was observed only in younger patients

(Lee et al., 2020). Thus, we assumed that the age at diagnosis of breast cancer could have an impact on CVD incidence. To date, whether younger age at diagnosis of breast cancer is associated with elevated risks of developing MI and HF remains unexplored. Therefore, by using data from the UK Biobank, of which data on the age at diagnosis of breast cancer and date of incident MI and HF were collected over a relatively long period, this study aimed to investigate the associations of age at diagnosis of breast cancer with subsequent risks of incident MI and HF.

## **Materials and methods**

### **Study design and population**

The UK Biobank is a prospective cohort involving sociodemographic and health information of over 270 000 female adults aged 40 and over in the UK. Baseline data were collected between 2006 and 2010. A detailed description of the design and sampling method of the UK Biobank can be found elsewhere (Hewitt et al., 2016; Sudlow et al., 2015). The UK Biobank has obtained ethical consent from the North West Multi-centre Research Ethics Committee (MREC) (299116). Written informed consent was received from all participants.

**Figure 1** presents the process of participant selection. Briefly, among the 273 325 female adults assessed at baseline, participants with MI or HF at baseline (n=2 992), without complete data on low-density lipoprotein cholesterol (LDL-C; n=18 912), or having MI or HF before breast cancer during follow-ups (n=144) were excluded. The remaining 251 277 participants were included in the analysis to investigate the

associations of breast cancer with incident MI and HF. Then, 16 241 participants with data on age at diagnosis of breast cancer were included in the analysis to evaluate the associations of age at diagnosis of breast cancer with incident MI and HF. Finally, 16 241 participants with breast cancer and their matched healthy controls (1:3; n=48 723) were included in the propensity score matching analysis to evaluate the associations between breast cancer and incident outcomes among different diagnosis age groups.

#### **Ascertainment of breast cancer and age at diagnosis of breast cancer**

Breast cancer and its diagnosis age were identified using the cancer registry data with the International Classification of Diseases Tenth Revision (ICD-10) codes of C50, which acquire information on cancer diagnoses from a variety of sources, including hospitals, cancer centers, treatment centers, cancer screening programs, hospices, and nursing homes, etc. Detailed information is presented in **Table S1**.

#### **Ascertainment of MI and HF**

Algorithmically defined MI with the date of diagnosis were ascertained using self-reported data, hospital inpatient records, and mortality register data in the UK Biobank. The earliest record of MI from these sources was considered as the date of first occurrence. For HF, the UK Biobank working group has provided the date of first occurrence with the ICD-10 codes of I50. Information on outcomes is detailed in **Table S2**. All outcomes were followed up to December 31, 2021.

#### **Covariates**

Covariates included age, ethnicity (white or nonwhite), educational level (higher educational level or not), current smoking (yes or no), current drinking ( $\geq$  once per



week), exercise, obesity, LDL-C, depressed mood, hypertension, diabetes, antihypertensive drug use (yes or no), antidiabetic drug use (yes or no), and statin use (yes or no). A higher educational level was defined as a college or university degree or other professional qualifications. Exercise was defined as participating in moderate or vigorous physical activity for  $\geq 10$  minutes at least twice per week. Depressed mood was defined as a participant reported feeling down, depressed, or hopeless nearly every day or more than half the days over the past two weeks. Hypertension was defined as systolic blood pressure (SBP)  $\geq 140$  mmHg, diastolic blood pressure (DBP)  $\geq 90$  mmHg, self-reported diagnosis of hypertension, or use of antihypertensive medications. Diabetes was defined as glycated hemoglobin  $\geq 6.5\%$ , self-reported diagnosis of diabetes, or use of antidiabetic therapy. Obesity was defined as a body mass index  $\geq 30$  kg/m<sup>2</sup>. Detailed information on covariates is presented in **Table S3**.

### **Statistical analysis**

The analytical baseline used for follow-up was defined as the baseline of UK Biobank (2006-2010). Baseline characteristics are presented as the mean  $\pm$  standard deviation for continuous variables and frequency (percentage) for categorical variables. The effect sizes of differences in baseline characteristics between participants with and without breast cancer are presented as standardized mean differences for continuous outcomes and the Phi coefficient for dichotomous outcomes, with the standardized mean difference or the Phi coefficient  $< -0.1$  or  $> 0.1$  considered significant. Cox proportional hazards models were applied to evaluate the associations of breast cancer and its diagnosis age with incident MI and HF. Years since baseline (2006-2010) to

the first occurrence date of MI or HF, death, loss of follow-up, or the end of follow-up (December 31, 2021), whichever came first, was the time scale in the Cox proportional hazards models. First, we examined the associations of breast cancer with subsequent MI and HF among the total population (n=251 277). Second, we tested the associations of age at diagnosis of breast cancer with MI and HF among participants with breast cancer (n=16 241). Third, we divided breast cancer participants into three groups according to age at diagnosis: <50 years (n=2 674), 50 to 59 years (n=5 637), and  $\geq$  60 years (n=7 930). Then, three matched healthy controls (1:3) were randomly selected for each breast cancer participant from participants without breast cancer by using the propensity score method (Parsons, 2004), which accounted for age, ethnicity, education, current smoking, current drinking, obesity, exercise, LDL-C, depressed mood, hypertension, diabetes, antihypertensive drug use, antidiabetic drug use, and statin use. The associations of breast cancer with incident MI and HF were analyzed in three age groups. The method of matching breast cancer patients with non-breast cancer controls in each diagnosis age group has been used in previous studies (Cigolle et al., 2022; Shang et al., 2021), as well as in the prior studies of our group (Liang et al., 2023; Wang et al., 2023; Zhang et al., 2023; Zheng et al., 2024).

Several sensitivity analyses were performed. First, subgroup analyses were performed to identify potential modifying effects from covariates on the associations of breast cancer and its diagnosis age with incident MI and HF. The Z test proposed by Altman and Bland was used to compare the difference between the two regression

coefficients from subgroup analyses (Altman and Bland, 2003). Second, competing risk models were employed to assess the influence of death as a competing event on the associations of age at diagnosis of breast cancer with incident MI and HF (Austin and Fine, 2017). Third, we excluded outcomes that occurred within 5 years since baseline and repeated our main analyses to control for potential reverse causality. Fourth, we restricted analyses to a subgroup of participants aged  $\geq 50$  years at baseline since the incidences of MI and HF were relatively low in younger participants. Fifth, we set the deadline for follow-up as December 31, 2019, and repeated main analyses to account for the influence of the COVID-19 pandemic on the diagnosis of breast cancer and outcomes since hospital admission and primary care services to chronic diseases were disrupted significantly during this period. Sixth, we further adjusted for menopausal status, breast cancer surgery, and hormone replacement therapy in the main analyses. Among participants with breast cancer, 11 460 (70.6%) participants were postmenopausal, 14 255 (87.6%) participants had undergone breast cancer surgery, and 6 784 (41.8%) participants had received hormone replacement therapy. Seventh, we added cubic spline curves of the association between the age at diagnosis of breast cancer and incident MI and HF with the age at diagnosis of breast cancer as a continuous variable. Eighth, we added Kaplan Meier curves comparing survival probabilities between breast cancer patients and matched controls in each diagnosis group.

Statistical analyses were performed with SAS 9.4 (SAS Institute, Cary, NC). All analyses were two-sided, with  $P < 0.05$  considered significant.

## Results

### Baseline characteristics

A total of 251 277 female participants (mean age: 56.8±8.0 years) were included in the present analyses, of whom 16 241 (6.5%) had breast cancer. The median age at diagnosis was 59 years (interquartile range [IQR]: 52-66 years). **Table 1** shows the baseline characteristics of the participants, grouped by breast cancer status. Overall, participants with breast cancer were older and had higher SBP levels.

### Associations of breast cancer with incident MI and HF

During a median follow-up of 12.8 years (IQR: 12.1-13.6 years), 4 549 (1.8%) MI and 4 917 (2.0%) HF were identified. As presented in **Table 2**, after adjusting for multiple covariates among the total population (n=251 277), breast cancer participants exhibited a significantly lower risk of developing MI (hazard ratio [HR]=0.83, 95% confidence interval [CI]: 0.73 to 0.94,  $P=0.002$ ) and a significantly higher risk of developing HF (HR=1.20, 95% CI: 1.09 to 1.33,  $P<0.001$ ).

### Associations of age at diagnosis of breast cancer with incident MI and HF among participants with breast cancer

As shown in **Table 3**, among 16 241 breast cancer participants, age at diagnosis was significantly associated with subsequent risks of MI and HF; that is, those diagnosed at younger ages had higher risks of developing MI (per 10-year decrease: HR=1.36, 95% CI: 1.19 to 1.56,  $P<0.001$ ) and HF (per 10-year decrease: HR=1.31, 95% CI: 1.18 to 1.46,  $P<0.001$ ).

### **Associations of breast cancer with incident MI and HF among different diagnosis age groups based on propensity score matching data**

We then further investigated the relationships between breast cancer and incident outcomes in different diagnosis age groups among 16 241 breast cancer participants and their matched healthy controls by using propensity score matching analyses. As presented in **Table S4**, after propensity score matching, no significant difference was detected between participants with and without breast cancer in all covariates. **Table 4** shows that breast cancer diagnosed before 50 years was associated with the highest HRs for incident MI and HF compared with those without breast cancer (MI: HR=1.75, 95% CI: 1.21 to 2.52,  $P=0.003$ ; HF: HR=2.21, 95% CI: 1.55 to 3.17,  $P<0.001$ ), followed by breast cancer diagnosed between 50 and 59 years (MI: HR=0.75, 95% CI: 0.58 to 0.97,  $P=0.028$ ; HF: HR=1.38, 95% CI: 1.13 to 1.69,  $P=0.002$ ), and then breast cancer diagnosed at 60 years and over (MI: HR=0.75, 95% CI: 0.63 to 0.89,  $P=0.001$ ; HF: HR=1.03, 95% CI: 0.90 to 1.19,  $P=0.650$ ).

### **Sensitivity analysis**

As shown in **Figures S1-6**, the results from subgroup analyses were similar to those from our main analyses. Interestingly, our subgroup analyses found that hypertension and diabetes modified the association of breast cancer with incident HF. Cubic spline curves of the association between age at diagnosis of breast cancer and incident MI and HF with age at diagnosis of breast cancer as a continuous variable and Kaplan Meier curves comparing survival probabilities between breast cancer patients and matched controls in each diagnosis group were consistent with our main results

(**Figures S7-14**). As presented in **Tables S5-14**, the results remained stable after further adjusting for competing risk of death, excluding participants diagnosed with MI or HF within 5 years since baseline, excluding participants aged < 50 years at baseline, setting the deadline of follow-up as December 31, 2019, or further adjusting for menopausal status, breast cancer, and hormone replacement therapy.

## **Discussion**

By using data from the large, prospective cohort of the UK Biobank, this study revealed that breast cancer patients were at a decreased risk of developing MI and an increased risk of developing HF compared to participants without breast cancer. It is worth noting that younger age at diagnosis of breast cancer was associated with elevated risks of incident MI and HF among breast cancer patients. After propensity score matching, the strength of the associations gradually increased with descending age at diagnosis of breast cancer.

Our findings were in line with several recent studies investigating the associations of breast cancer with CVD (Gue et al., 2022; Strongman et al., 2019). A large cohort study linked to the UK Clinical Practice Research Datalink revealed a decreased risk of incident MI and an increased risk of incident HF in breast cancer patients during an average 7-year follow-up, with an HR of 0.82 and 1.13, respectively, which was close to our results (Strongman et al., 2019). Another population-based study at the nationwide level in France, with a mean follow-up of 5 years, also demonstrated similar risks of MI and HF (Gue et al., 2022). The elevated risk of subsequent HF in

breast cancer patients has been observed in most studies, which may be related to the cardiotoxic effect on the myocardium induced by anthracycline and trastuzumab (Abdel-Qadir et al., 2019; Gue et al., 2022; Lee et al., 2020; Reding et al., 2022; Strongman et al., 2019; Yang et al., 2022). The decreased risk of MI observed in the study might be driven by the cardioprotective effects of tamoxifen and socioeconomic factors, as indicated in previous studies (Grainger and Schofield, 2005; Khosrow-Khavar et al., 2017; Tweed et al., 2018), while the precise mechanisms have not yet been elucidated. However, previous findings concerning MI or ischemic heart disease were inconsistent, with some researchers reporting increased risk (Armenian et al., 2016; Rugbjerg et al., 2014), but others observing null results (Abdel-Qadir et al., 2019; Khan et al., 2011). The discordance may be partly due to heterogeneity in population characteristics, length of follow-ups, and sources of breast cancer and CVD data. For example, the age of the population might influence the association, as indicated by a nationwide cohort study in Korea, which showed that an increased risk of HF only existed in younger breast cancer patients (< 50 years) (Lee et al., 2020). Moreover, the present study extended prior research by comparing the risk of MI and HF among different diagnosis age groups and demonstrated that age at diagnosis of breast cancer was an important determinant for the risks of incident MI and HF.

To the best of our knowledge, this is the largest study to date to explore the impact of the age at diagnosis of breast cancer on the subsequent risks of MI and HF. With accurate data on age at diagnosis of breast cancer and sufficient CVD events over the lengthy follow-up, this study revealed that risks of incident MI and HF

increased with decreasing age at diagnosis of breast cancer (especially < 50 years). A Danish cohort study focused on patients of adolescent and young adult cancer indicated that breast cancer patients diagnosed at younger ages, particularly between 20 and 24 years, had the highest risk of CVD (Rugbjerg et al., 2014). Similarly, the Teenage and Young Adult Cancer Survivor Study demonstrated that cardiac death risk increased in younger diagnosis age groups, although the trend was not significant (Henson et al., 2016). Possibly due to a relatively small sample size, a narrow range of diagnosis age, and insufficient CVD events, the trend between age at diagnosis of breast cancer and CVD risk was not detected in the two studies, and the results need further verification. The present study addressed these issues by focusing on a population with an age at diagnosis ranging from 27 to 82 years, while the prior studies were both limited to 15 to 39 years and with nearly 10 000 participants diagnosed with MI or HF during the follow-up, providing a robust and reliable finding on the associations of the age at diagnosis of breast cancer with MI and HF.

Although the mechanisms underlying the associations are still not fully understood, several potential pathways have been proposed. First, younger age was found to be associated with a higher tumor grade and a more aggressive phenotype (e.g., triple-negative breast cancer) in breast cancer patients (Colleoni et al., 2002; El Saghir et al., 2006; McGuire et al., 2015), for whom anthracycline-containing chemotherapy was the usual therapeutic regimen. Anthracycline is known to confer great cardiotoxicity by harming cardiac myocytes at a cumulative dose, resulting in subsequent CVD (Greenlee et al., 2022; Hooning et al., 2007; Smith et al., 2010).



Second, patients diagnosed at younger ages tended to choose breast-conserving surgery, often accompanied by radiotherapy, which was associated with an accelerated coronary calcium burden (Lai et al., 2021). A dose-response relationship has been observed between radiotherapy and CVD, with major coronary events increasing by 7.4% per gray (Darby et al., 2013). Third, younger premenopausal patients were at risk of early menopause induced by chemotherapy (Zavos and Valachis, 2016), leading to reduced exposure to the cardioprotective effects of estrogen and an elevated risk of developing CVD (Mendelsohn and Karas, 1999; Wellons et al., 2012; Xu et al., 2006). Furthermore, hormone replacement therapy in postmenopausal women was also associated with increased CVD risk (Rossouw et al., 2002).

This study has several strengths. First, data on the diagnosis of MI and HF were from hospital inpatient records, mortality register data, primary care data, and self-reported data (UK Biobank Follow-up and Outcomes Working Group, 2022). These multisource data outweighed self-reported data with higher accuracy, as approximately 30% of self-reported CVD cases were misclassified by patients (Barr et al., 2009). Second, the large sample size of the UK Biobank ensured a robust conclusion on the associations of the age at diagnosis of breast cancer with MI and HF with sufficient statistical power. Third, propensity score matching analyses after controlling for multiple traditional risk factors significantly reduced confounding bias.

Despite these strengths, the present study has some limitations. First, a causal relationship cannot be concluded due to the observational study design. Second, 22 048 participants were excluded, which might lead to selection bias. Significant

differences in LDL-C levels existed between participants included and excluded (Table S15). In general, the participants included were younger and healthier, which might bias the associations observed in this study. Third, even though we have adjusted for many traditional confounders, the possibility of residual confounding cannot be ruled out. For instance, due to a lack of information on the staging of breast cancer, radiotherapy, and chemotherapy of breast cancer patients in the UK Biobank, we were unable to assess the impact of these potential confounders. Fourth, the study population primarily consisted of the white ethnicity with a proportion of 94.3%, which may not represent the general UK population. Thus, generalization of the findings should be cautious, and validations in other populations are needed.

## **Conclusion**

This study demonstrated that a younger age at diagnosis of breast cancer was associated with higher risks of incident MI and HF. This finding has significant implications for clinical and public health, highlighting the need to pay attention to the cardiovascular health of younger breast cancer patients, especially those diagnosed before 50 years. Further studies concerning this aspect are warranted and cardiac monitoring strategies need to be developed based on the cardiovascular risk of these individuals.

## **Acknowledgments**

We appreciate efforts made by the original data creators, depositors, copyright holders, the funders of the data collections, and their contributions to access to data from the

UK Biobank, approved project number 90492.

### **Competing interests**

None.

### **Funding**

This study was supported by grants from the National Natural Science Foundation of China (82373665 & 81974490), the Nonprofit Central Research Institute Fund of Chinese Academy of Medical Sciences (2021-RC330-001), and the 2022 China Medical Board-open competition research grant (22-466). All authors had no conflict of interest.

### **Author contributions**

Fanfan Zheng and Wuxiang Xie participated in the study conception and design, supervised the data analysis, reviewed the paper, and approved the final draft for submission. Jie Liang participated in the study conception and design, analyzed data, and wrote and approved the final draft for submission. All authors reviewed the paper, made critical revisions, and approved the final draft for submission.

### **Ethics**

The UK Biobank has received ethical consent from the North West Multi-centre Research Ethics Committee (MREC) (299116). Written informed consent was obtained from all participants. This research was done without participants' involvement.

### **Availability of data and materials**

The data used for analysis in this study are available from the UK Biobank project site,

subject to registration and application processes. Further details can be found at

<https://www.ukbiobank.ac.uk>.

## References

- Abdel-Qadir, H., Thavendiranathan, P., Austin, P.C., Lee, D.S., Amir, E., Tu, J.V., Fung, K., Anderson, G.M., 2019. The Risk of Heart Failure and Other Cardiovascular Hospitalizations After Early Stage Breast Cancer: A Matched Cohort Study. *J Natl Cancer Inst* 111, 854-862. DOI: <https://doi.org/10.1093/jnci/djy218>
- Allemani, C., Matsuda, T., Di Carlo, V., Harewood, R., Matz, M., Nikšić, M., Bonaventure, A., Valkov, M., Johnson, C.J., Estève, J., Ogunbiyi, O.J., Azevedo, E.S.G., Chen, W.Q., Eser, S., Engholm, G., Stiller, C.A., Monnereau, A., Woods, R.R., Visser, O., Lim, G.H., Aitken, J., Weir, H.K., Coleman, M.P., 2018. Global surveillance of trends in cancer survival 2000-14 (CONCORD-3): analysis of individual records for 37 513 025 patients diagnosed with one of 18 cancers from 322 population-based registries in 71 countries. *Lancet* 391, 1023-1075. DOI: [https://doi.org/10.1016/s0140-6736\(17\)33326-3](https://doi.org/10.1016/s0140-6736(17)33326-3)
- Altman, D.G., Bland, J.M., 2003. Interaction revisited: the difference between two estimates. *BMJ* 326, 219. DOI: <https://doi.org/10.1136/bmj.326.7382.219>
- American Cancer Society, 2019. Breast Cancer Facts and Figures 2019-2020. *Am Cancer Soc*, 1-44. DOI:
- Armenian, S.H., Xu, L., Ky, B., Sun, C., Farol, L.T., Pal, S.K., Douglas, P.S., Bhatia, S., Chao, C., 2016. Cardiovascular Disease Among Survivors of Adult-Onset Cancer: A Community-Based Retrospective Cohort Study. *J Clin Oncol* 34, 1122-1130. DOI: <https://doi.org/10.1200/jco.2015.64.0409>

Austin, P.C., Fine, J.P., 2017. Practical recommendations for reporting Fine-Gray model analyses for competing risk data. *Stat Med* 36, 4391-4400. DOI: <https://doi.org/10.1002/sim.7501>

Barish, R., Lynce, F., Unger, K., Barac, A., 2019. Management of Cardiovascular Disease in Women With Breast Cancer. *Circulation* 139, 1110-1120. DOI: <https://doi.org/10.1161/circulationaha.118.039371>

Barr, E.L., Tonkin, A.M., Welborn, T.A., Shaw, J.E., 2009. Validity of self-reported cardiovascular disease events in comparison to medical record adjudication and a statewide hospital morbidity database: the AusDiab study. *Intern Med J* 39, 49-53. DOI: <https://doi.org/10.1111/j.1445-5994.2008.01864.x>

Berry, D.A., Cronin, K.A., Plevritis, S.K., Fryback, D.G., Clarke, L., Zelen, M., Mandelblatt, J.S., Yakovlev, A.Y., Habbema, J.D., Feuer, E.J., 2005. Effect of screening and adjuvant therapy on mortality from breast cancer. *N Engl J Med* 353, 1784-1792. DOI: <https://doi.org/10.1056/NEJMoa050518>

Blaes, A.H., Konety, S.H., 2021. Cardiovascular Disease in Breast Cancer Survivors: An Important Topic in Breast Cancer Survivorship. *J Natl Cancer Inst* 113, 105-106. DOI: <https://doi.org/10.1093/jnci/djaa097>

Cancer Research UK, 2019. Cancer statistics for the UK. <https://www.cancerresearchuk.org/health-professional/cancer-statistics-for-the-uk>.

Cigolle, C.T., Blaum, C.S., Lyu, C., Ha, J., Kabeto, M., Zhong, J., 2022. Associations of Age at Diagnosis and Duration of Diabetes With Morbidity and

Mortality Among Older Adults. JAMA Netw Open 5, e2232766. DOI:

<https://doi.org/10.1001/jamanetworkopen.2022.32766>

Colleoni, M., Rotmensz, N., Robertson, C., Orlando, L., Viale, G., Renne, G., Luini,

A., Veronesi, P., Intra, M., Orecchia, R., Catalano, G., Galimberti, V., Nolé, F.,

Martinelli, G., Goldhirsch, A., 2002. Very young women (<35 years) with

operable breast cancer: features of disease at presentation. Ann Oncol 13,

273-279. DOI: <https://doi.org/10.1093/annonc/mdf039>

Darby, S.C., Ewertz, M., McGale, P., Bennet, A.M., Blom-Goldman, U., Brønnum,

D., Correa, C., Cutter, D., Gagliardi, G., Gigante, B., Jensen, M.B., Nisbet, A.,

Peto, R., Rahimi, K., Taylor, C., Hall, P., 2013. Risk of ischemic heart disease in

women after radiotherapy for breast cancer. N Engl J Med 368, 987-998. DOI:

<https://doi.org/10.1056/NEJMoa1209825>

Du, X.L., Xia, R., Liu, C.C., Cormier, J.N., Xing, Y., Hardy, D., Chan, W., Burau, K.,

2009. Cardiac toxicity associated with anthracycline-containing chemotherapy

in older women with breast cancer. Cancer 115, 5296-5308. DOI:

<https://doi.org/10.1002/cncr.24621>

El Saghir, N.S., Seoud, M., Khalil, M.K., Charafeddine, M., Salem, Z.K., Geara, F.B.,

Shamseddine, A.I., 2006. Effects of young age at presentation on survival in

breast cancer. BMC Cancer 6, 194. DOI:

<https://doi.org/10.1186/1471-2407-6-194>

Florido, R., Daya, N.R., Ndumele, C.E., Koton, S., Russell, S.D., Prizment, A.,

Blumenthal, R.S., Matsushita, K., Mok, Y., Felix, A.S., Coresh, J., Joshi, C.E.,

- Platz, E.A., Selvin, E., 2022. Cardiovascular Disease Risk Among Cancer Survivors: The Atherosclerosis Risk In Communities (ARIC) Study. *J Am Coll Cardiol* 80, 22-32. DOI: <https://doi.org/10.1016/j.jacc.2022.04.042>
- Grainger, D.J., Schofield, P.M., 2005. Tamoxifen for the prevention of myocardial infarction in humans: preclinical and early clinical evidence. *Circulation* 112, 3018-3024. DOI: <https://doi.org/10.1161/circulationaha.104.531178>
- Greenlee, H., Iribarren, C., Rana, J.S., Cheng, R., Nguyen-Huynh, M., Rillamas-Sun, E., Shi, Z., Laurent, C.A., Lee, V.S., Roh, J.M., Santiago-Torres, M., Shen, H., Hershman, D.L., Kushi, L.H., Neugebauer, R., Kwan, M.L., 2022. Risk of Cardiovascular Disease in Women With and Without Breast Cancer: The Pathways Heart Study. *J Clin Oncol* 40, 1647-1658. DOI: <https://doi.org/10.1200/jco.21.01736>
- Gue, Y.X., Bisson, A., Bodin, A., Herbert, J., Lip, G.Y.H., Fauchier, L., 2022. Breast cancer and incident cardiovascular events: A systematic analysis at the nationwide level. *Eur J Clin Invest* 52, e13754. DOI: <https://doi.org/10.1111/eci.13754>
- Henson, K.E., Reulen, R.C., Winter, D.L., Bright, C.J., Fidler, M.M., Frobisher, C., Guha, J., Wong, K.F., Kelly, J., Edgar, A.B., McCabe, M.G., Whelan, J., Cutter, D.J., Darby, S.C., Hawkins, M.M., 2016. Cardiac Mortality Among 200,000 Five-Year Survivors of Cancer Diagnosed at 15 to 39 Years of Age: The Teenage and Young Adult Cancer Survivor Study. *Circulation* 134, 1519-1531. DOI: <https://doi.org/10.1161/circulationaha.116.022514>



- Hewitt, J., Walters, M., Padmanabhan, S., Dawson, J., 2016. Cohort profile of the UK Biobank: diagnosis and characteristics of cerebrovascular disease. *BMJ Open* 6, e009161. DOI: <https://doi.org/10.1136/bmjopen-2015-009161>
- Hooning, M.J., Botma, A., Aleman, B.M., Baaijens, M.H., Bartelink, H., Klijn, J.G., Taylor, C.W., van Leeuwen, F.E., 2007. Long-term risk of cardiovascular disease in 10-year survivors of breast cancer. *J Natl Cancer Inst* 99, 365-375. DOI: <https://doi.org/10.1093/jnci/djk064>
- Khan, N.F., Mant, D., Carpenter, L., Forman, D., Rose, P.W., 2011. Long-term health outcomes in a British cohort of breast, colorectal and prostate cancer survivors: a database study. *Br J Cancer* 105 Suppl 1, S29-37. DOI: <https://doi.org/10.1038/bjc.2011.420>
- Khosrow-Khavar, F., Fillion, K.B., Al-Qurashi, S., Torabi, N., Bouganim, N., Suissa, S., Azoulay, L., 2017. Cardiotoxicity of aromatase inhibitors and tamoxifen in postmenopausal women with breast cancer: a systematic review and meta-analysis of randomized controlled trials. *Ann Oncol* 28, 487-496. DOI: <https://doi.org/10.1093/annonc/mdw673>
- Khouri, M.G., Douglas, P.S., Mackey, J.R., Martin, M., Scott, J.M., Scherrer-Crosbie, M., Jones, L.W., 2012. Cancer therapy-induced cardiac toxicity in early breast cancer: addressing the unresolved issues. *Circulation* 126, 2749-2763. DOI: <https://doi.org/10.1161/circulationaha.112.100560>
- Koene, R.J., Prizment, A.E., Blaes, A., Konety, S.H., 2016. Shared Risk Factors in Cardiovascular Disease and Cancer. *Circulation* 133, 1104-1114. DOI:

<https://doi.org/10.1161/circulationaha.115.020406>

Lai, Y.H., Chen, H.H.W., Tsai, Y.S., 2021. Accelerated coronary calcium burden in breast cancer patients after radiotherapy: a comparison with age and race matched healthy women. *Radiat Oncol* 16, 210. DOI:

<https://doi.org/10.1186/s13014-021-01936-w>

Lee, J., Hur, H., Lee, J.W., Youn, H.J., Han, K., Kim, N.W., Jung, S.Y., Kim, Z., Kim, K.S., Lee, M.H., Han, S.H., Jung, S.H., Chung, I.Y., 2020. Long-term risk of congestive heart failure in younger breast cancer survivors: A nationwide study by the SMARTSHIP group. *Cancer* 126, 181-188. DOI:

<https://doi.org/10.1002/cncr.32485>

Liang, J., Li, C., Gao, D., Ma, Q., Wang, Y., Pan, Y., Zhang, W., Xie, W., Zheng, F., 2023. Association Between Onset Age of Coronary Heart Disease and Incident Dementia: A Prospective Cohort Study. *J Am Heart Assoc* 12, e031407. DOI:

<https://doi.org/10.1161/jaha.123.031407>

Lin, K.J., Lengacher, C.A., 2019. Anthracycline Chemotherapy-Induced Cardiotoxicity in Breast Cancer Survivors: A Systematic Review. *Oncol Nurs Forum* 46, E145-e158. DOI: <https://doi.org/10.1188/19.Onf.E145-e158>

McGuire, A., Brown, J.A., Malone, C., McLaughlin, R., Kerin, M.J., 2015. Effects of age on the detection and management of breast cancer. *Cancers (Basel)* 7, 908-929. DOI: <https://doi.org/10.3390/cancers7020815>

Mendelsohn, M.E., Karas, R.H., 1999. The protective effects of estrogen on the cardiovascular system. *N Engl J Med* 340, 1801-1811. DOI:

<https://doi.org/10.1056/nejm199906103402306>

- Parsons, L.S., 2004. Performing a 1: N case-control match on propensity score, Proceedings of the 29th Annual SAS users group international conference. SAS Institute Montreal, Montreal, Canada, p. e11.
- Patnaik, J.L., Byers, T., DiGuseppi, C., Dabelea, D., Denberg, T.D., 2011. Cardiovascular disease competes with breast cancer as the leading cause of death for older females diagnosed with breast cancer: a retrospective cohort study. *Breast Cancer Res* 13, R64. DOI: <https://doi.org/10.1186/bcr2901>
- Reding, K.W., Cheng, R.K., Vasbinder, A., Ray, R.M., Barac, A., Eaton, C.B., Saquib, N., Shadyab, A.H., Simon, M.S., Langford, D., Branch, M., Caan, B., Anderson, G., 2022. Lifestyle and Cardiovascular Risk Factors Associated With Heart Failure Subtypes in Postmenopausal Breast Cancer Survivors. *JACC CardioOncol* 4, 53-65. DOI: <https://doi.org/10.1016/j.jaccao.2022.01.099>
- Rossouw, J.E., Anderson, G.L., Prentice, R.L., LaCroix, A.Z., Kooperberg, C., Stefanick, M.L., Jackson, R.D., Beresford, S.A., Howard, B.V., Johnson, K.C., Kotchen, J.M., Ockene, J., 2002. Risks and benefits of estrogen plus progestin in healthy postmenopausal women: principal results From the Women's Health Initiative randomized controlled trial. *JAMA* 288, 321-333. DOI: <https://doi.org/10.1001/jama.288.3.321>
- Rugbjerg, K., Mellekjaer, L., Boice, J.D., Køber, L., Ewertz, M., Olsen, J.H., 2014. Cardiovascular disease in survivors of adolescent and young adult cancer: a Danish cohort study, 1943-2009. *J Natl Cancer Inst* 106, dju110. DOI:

<https://doi.org/10.1093/jnci/dju110>

Shang, X., Hill, E., Zhu, Z., Liu, J., Ge, B.Z., Wang, W., He, M., 2021. The Association of Age at Diagnosis of Hypertension With Brain Structure and Incident Dementia in the UK Biobank. *Hypertension* 78, 1463-1474. DOI:

<https://doi.org/10.1161/hypertensionaha.121.17608>

Smith, L.A., Cornelius, V.R., Plummer, C.J., Levitt, G., Verrill, M., Canney, P., Jones, A., 2010. Cardiotoxicity of anthracycline agents for the treatment of cancer: systematic review and meta-analysis of randomised controlled trials. *BMC Cancer* 10, 337. DOI: <https://doi.org/10.1186/1471-2407-10-337>

Strongman, H., Gadd, S., Matthews, A., Mansfield, K.E., Stanway, S., Lyon, A.R., Dos-Santos-Silva, I., Smeeth, L., Bhaskaran, K., 2019. Medium and long-term risks of specific cardiovascular diseases in survivors of 20 adult cancers: a population-based cohort study using multiple linked UK electronic health records databases. *Lancet* 394, 1041-1054. DOI:

[https://doi.org/10.1016/s0140-6736\(19\)31674-5](https://doi.org/10.1016/s0140-6736(19)31674-5)

Sudlow, C., Gallacher, J., Allen, N., Beral, V., Burton, P., Danesh, J., Downey, P., Elliott, P., Green, J., Landray, M., Liu, B., Matthews, P., Ong, G., Pell, J., Silman, A., Young, A., Sprosen, T., Peakman, T., Collins, R., 2015. UK biobank: an open access resource for identifying the causes of a wide range of complex diseases of middle and old age. *PLoS Med* 12, e1001779. DOI:

<https://doi.org/10.1371/journal.pmed.1001779>

Sung, H., Ferlay, J., Siegel, R.L., Laversanne, M., Soerjomataram, I., Jemal, A., Bray,

- F., 2021. Global Cancer Statistics 2020: GLOBOCAN Estimates of Incidence and Mortality Worldwide for 36 Cancers in 185 Countries. *CA Cancer J Clin* 71, 209-249. DOI: <https://doi.org/10.3322/caac.21660>
- Tweed, E.J., Allardice, G.M., McLoone, P., Morrison, D.S., 2018. Socio-economic inequalities in the incidence of four common cancers: a population-based registry study. *Public Health* 154, 1-10. DOI: <https://doi.org/10.1016/j.puhe.2017.10.005>
- UK Biobank Follow-up and Outcomes Working Group, 2022. UK Biobank Algorithmically defined outcomes, Version 2.0 ed.
- Wang, Y., Li, C., Liang, J., Gao, D., Pan, Y., Zhang, W., Zhang, Y., Zheng, F., Xie, W., 2023. Onset age of diabetes and incident dementia: A prospective cohort study. *J Affect Disord* 329, 493-499. DOI: <https://doi.org/10.1016/j.jad.2023.02.138>
- Wellons, M., Ouyang, P., Schreiner, P.J., Herrington, D.M., Vaidya, D., 2012. Early menopause predicts future coronary heart disease and stroke: the Multi-Ethnic Study of Atherosclerosis. *Menopause* 19, 1081-1087. DOI: <https://doi.org/10.1097/gme.0b013e3182517bd0>
- Xu, Y., Arenas, I.A., Armstrong, S.J., Plahta, W.C., Xu, H., Davidge, S.T., 2006. Estrogen improves cardiac recovery after ischemia/reperfusion by decreasing tumor necrosis factor-alpha. *Cardiovasc Res* 69, 836-844. DOI: <https://doi.org/10.1016/j.cardiores.2005.11.031>
- Yang, H., Bhoo-Pathy, N., Brand, J.S., Hedayati, E., Grassmann, F., Zeng, E., Bergh,

- J., Bian, W., Ludvigsson, J.F., Hall, P., Czene, K., 2022. Risk of heart disease following treatment for breast cancer-results from a population-based cohort study. *Elife* 11. DOI: <https://doi.org/10.7554/eLife.71562>
- Yeh, E.T., Bickford, C.L., 2009. Cardiovascular complications of cancer therapy: incidence, pathogenesis, diagnosis, and management. *J Am Coll Cardiol* 53, 2231-2247. DOI: <https://doi.org/10.1016/j.jacc.2009.02.050>
- Zavos, A., Valachis, A., 2016. Risk of chemotherapy-induced amenorrhea in patients with breast cancer: a systematic review and meta-analysis. *Acta Oncol* 55, 664-670. DOI: <https://doi.org/10.3109/0284186x.2016.1155738>
- Zhang, W., Liang, J., Li, C., Gao, D., Ma, Q., Pan, Y., Wang, Y., Xie, W., Zheng, F., 2023. Age at Diagnosis of Atrial Fibrillation and Incident Dementia. *JAMA Netw Open* 6, e2342744. DOI: <https://doi.org/10.1001/jamanetworkopen.2023.42744>
- Zheng, F., Liang, J., Li, C., Ma, Q., Pan, Y., Zhang, W., Gao, D., Wang, Y., Xie, W., 2024. Age at Onset of Heart Failure and Subsequent Risk of Dementia: A Longitudinal Cohort Study. *JACC Heart Fail* 12, 826-835. DOI: <https://doi.org/10.1016/j.jchf.2023.08.006>

**Table 1. Baseline characteristics of the study participants, by whether they had a history of breast cancer at baseline or incident breast cancer during follow-up (n=251 277)**

| <b>Characteristic</b>     | <b>Breast cancer<br/>(n=16 241)</b> | <b>Non-breast cancer<br/>(n=235 036)</b> | <b>Effect<br/>size<sup>a</sup></b> |
|---------------------------|-------------------------------------|------------------------------------------|------------------------------------|
| Age, years                | 58.9±7.3                            | 56.7±8.0                                 | 0.275                              |
| White                     | 15 619 (96.2)                       | 221 292 (94.2)                           | 0.021                              |
| Higher education          | 7 571 (46.6)                        | 109 362 (46.5)                           | <0.001                             |
| Current smoking           | 1 390 (8.6)                         | 20 764 (8.8)                             | -0.002                             |
| Current drinking          | 10 451 (64.4)                       | 146 679 (62.4)                           | 0.010                              |
| Obesity                   | 3 934 (24.2)                        | 54 321 (23.1)                            | 0.007                              |
| Exercise                  | 12 506 (77.0)                       | 182 852 (77.8)                           | -0.005                             |
| SBP, mmHg                 | 137.4±19.4                          | 135.1±19.2                               | 0.118                              |
| DBP, mmHg                 | 81.4±9.9                            | 80.7±10.0                                | 0.065                              |
| HbA <sub>1c</sub> , %     | 3.63±0.60                           | 3.57±0.59                                | 0.093                              |
| TC, mmol/L                | 5.95±1.14                           | 5.88±1.12                                | 0.060                              |
| HDL-C, mmol/L             | 1.60±0.38                           | 1.59±0.38                                | 0.008                              |
| LDL-C, mmol/L             | 3.67±0.88                           | 3.63±0.87                                | 0.049                              |
| Depressed mood            | 778 (4.8)                           | 12 351 (5.3)                             | -0.005                             |
| Hypertension              | 8 643 (53.2)                        | 112 667 (47.9)                           | 0.026                              |
| Diabetes                  | 795 (4.9)                           | 9 883 (4.2)                              | 0.008                              |
| Antihypertensive drug use | 3 203 (19.7)                        | 39 767 (16.9)                            | 0.018                              |

|                       |              |               |       |
|-----------------------|--------------|---------------|-------|
| Antidiabetic drug use | 449 (2.8)    | 5 628 (2.4)   | 0.006 |
| Statin use            | 1 885 (11.6) | 24 502 (10.4) | 0.010 |

---

The results are presented as the mean  $\pm$  standard deviation or No. (%).

<sup>a</sup>The effect sizes are standardized mean differences for continuous outcomes and the

Phi coefficient for dichotomous outcomes.

SBP, systolic blood pressure; DBP, diastolic blood pressure; HbA<sub>1c</sub>, glycated

hemoglobin; TC, total cholesterol; HDL-C, high-density lipoprotein cholesterol;

LDL-C, low-density lipoprotein cholesterol.



**Table 2. Associations of breast cancer with incident myocardial infarction and heart failure (n=251 277)**

| Outcome               | HR (95% CI)                         |         |
|-----------------------|-------------------------------------|---------|
|                       | Breast cancer vs. Non-breast cancer | P value |
| Myocardial infarction |                                     |         |
| Model 1 <sup>a</sup>  | 0.84 (0.74 to 0.95)                 | 0.005   |
| Model 2 <sup>b</sup>  | 0.83 (0.73 to 0.94)                 | 0.002   |
| Heart failure         |                                     |         |
| Model 1 <sup>a</sup>  | 1.24 (1.12 to 1.27)                 | <0.001  |
| Model 2 <sup>b</sup>  | 1.20 (1.09 to 1.33)                 | <0.001  |

<sup>a</sup>Adjusted for age, ethnicity, and education.

Further adjusted for current smoking, current drinking, obesity, exercise, low-density lipoprotein cholesterol, depressed mood, hypertension, diabetes, antihypertensive drug use, antidiabetic drug use, and statin use.

HR, hazard ratio; CI, confidence interval.

**Table 3. Associations of age at diagnosis of breast cancer with incident myocardial infarction and heart failure among participants with breast cancer (n=16 241)**

| <b>Outcome</b>               | <b>HR (95% CI)<sup>a</sup></b> | <b>P value</b> |
|------------------------------|--------------------------------|----------------|
| <b>Myocardial infarction</b> |                                |                |
| ≥ 60 years (n=7 930)         | Reference                      | /              |
| 50-59 years (n=5 637)        | 1.05 (0.78 to 1.40)            | 0.750          |
| < 50 years (n=2 674)         | 2.20 (1.54 to 3.15)            | <0.001         |
| Per 10-year decrease         | 1.36 (1.19 to 1.56)            | <0.001         |
| <b>Heart failure</b>         |                                |                |
| ≥ 60 years (n=7 930)         | Reference                      | /              |
| 50-59 years (n=5 637)        | 1.32 (1.07 to 1.64)            | 0.010          |
| < 50 years (n=2 674)         | 1.68 (1.22 to 2.31)            | 0.001          |
| Per 10-year decrease         | 1.31 (1.18 to 1.46)            | <0.001         |

<sup>a</sup>Adjusted for age, ethnicity, education, current smoking, current drinking, obesity, exercise, low-density lipoprotein cholesterol, depressed mood, hypertension, diabetes, antihypertensive drug use, antidiabetic drug use, and statin use.

HR, hazard ratio; CI, confidence interval.

**Table 4. Associations of breast cancer with incident myocardial infarction and heart failure among different diagnosis age groups after propensity score matching (n=64 964)**

| Outcome                | HR (95% CI) <sup>a</sup>            |         |
|------------------------|-------------------------------------|---------|
|                        | Breast cancer vs. Non-breast cancer | P value |
| Myocardial infarction  |                                     |         |
| ≥ 60 years (n=31 720)  | 0.75 (0.63 to 0.89)                 | 0.001   |
| 50-59 years (n=22 548) | 0.75 (0.58 to 0.97)                 | 0.028   |
| < 50 years (n=10 696)  | 1.75 (1.21 to 2.52)                 | 0.003   |
| Heart failure          |                                     |         |
| ≥ 60 years (n=31 720)  | 1.03 (0.90 to 1.19)                 | 0.650   |
| 50-59 years (n=22 548) | 1.38 (1.13 to 1.69)                 | 0.002   |
| < 50 years (n=10 696)  | 2.21 (1.55 to 3.17)                 | <0.001  |

<sup>a</sup>Adjusted for age, ethnicity, education, current smoking, current drinking, obesity, exercise, low-density lipoprotein cholesterol, depressed mood, hypertension, diabetes, antihypertensive drug use, antidiabetic drug use, and statin use.

HR, hazard ratio; CI, confidence interval.

## Figure Legends

**Figure 1.** Flow chart of participant selection for this study

**Figure 1.** Flow chart of participant selection for this study

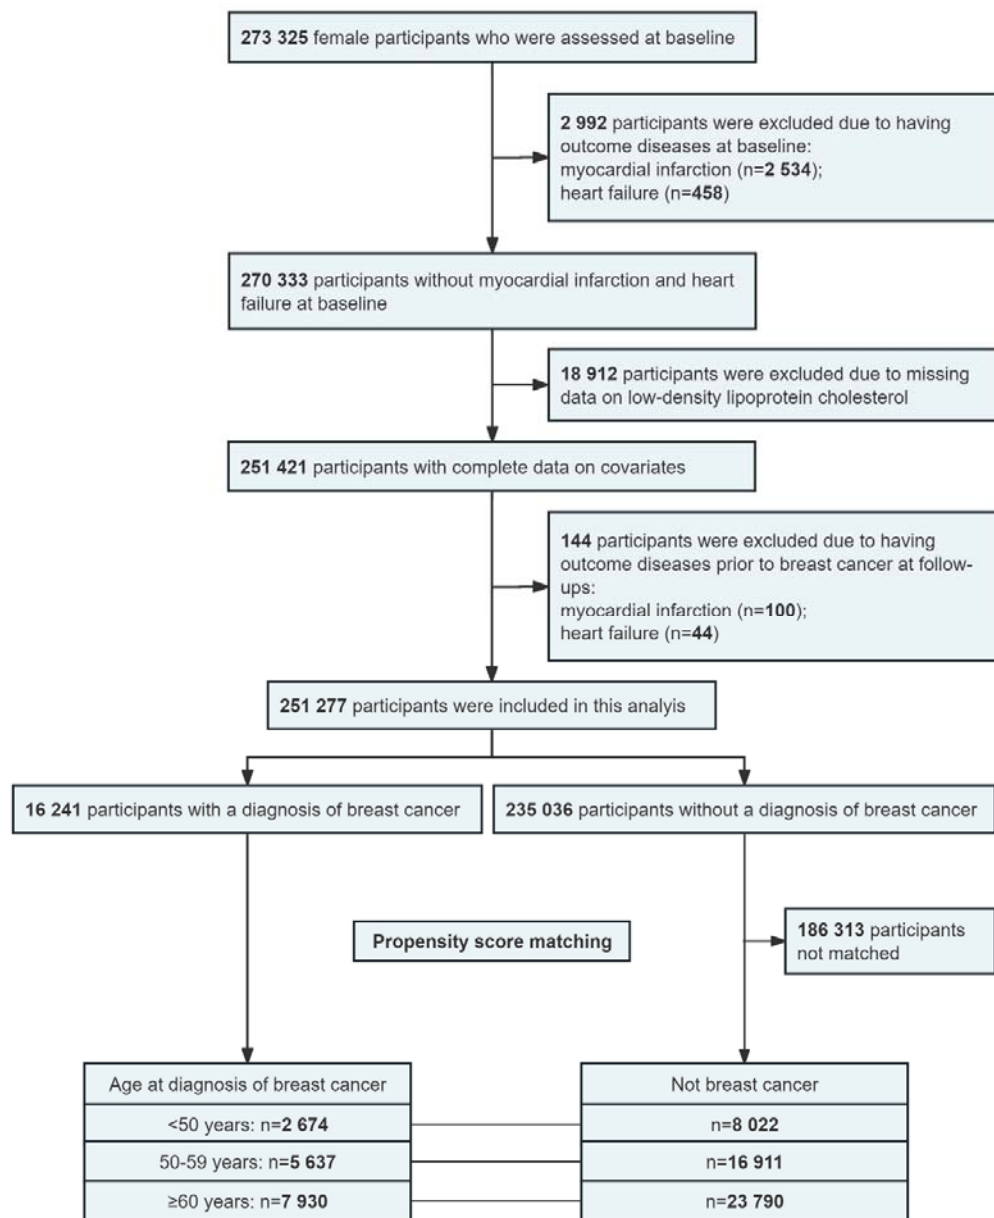

Source: https://medrxiv.org/content/10.1101/2024.01.24.24301711v2.full.pdf
